# Supplementary material for: Synthesis and Biological Evaluation of Carbocyclic Analogues of Pachastrissamine
Source: PubMed Central journal article supplement (PMC4344604; doi:10.3390/md13020824), 2015-02-03
Supplement: marinedrugs-13-00824-s001.pdf [file marinedrugs-13-00824-s001.pdf]

# Supplementary Information

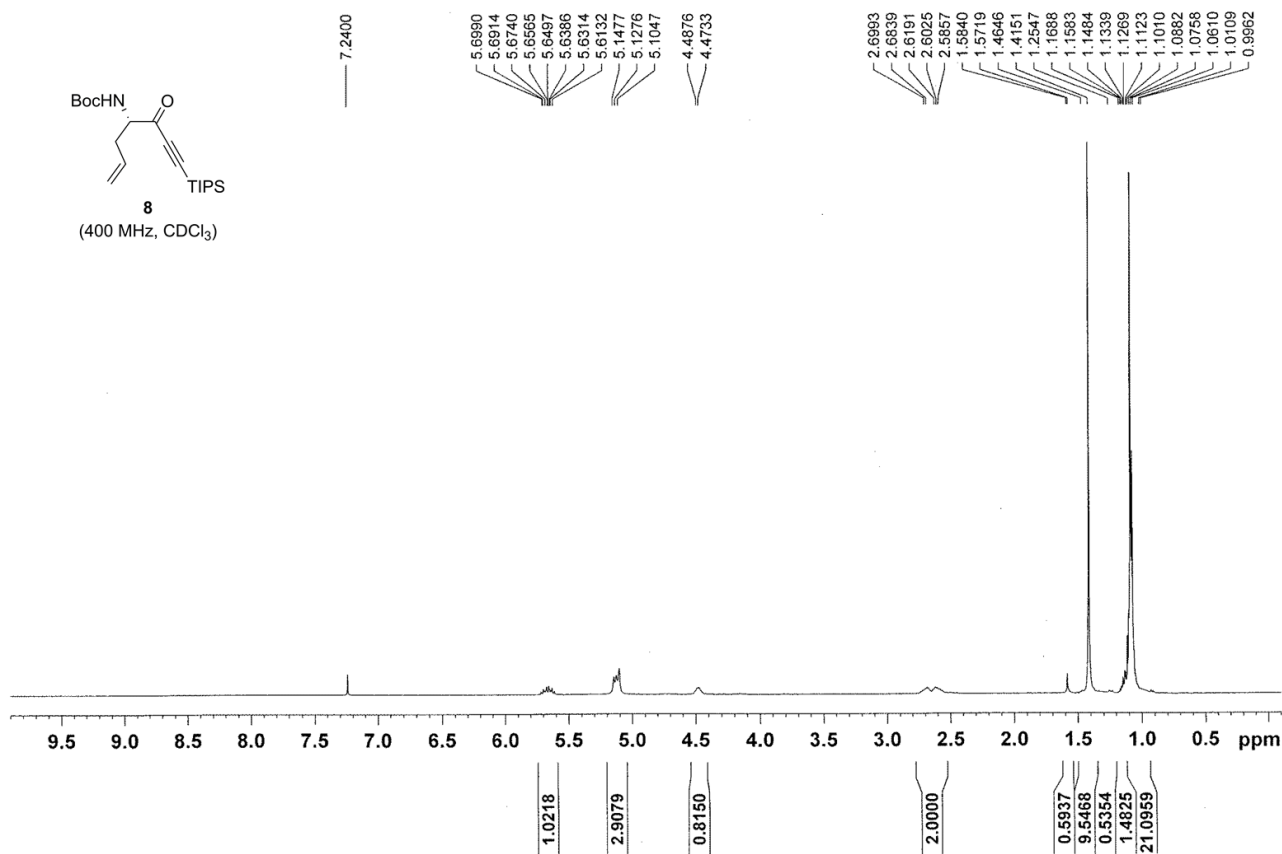

Figure S1. <sup>1</sup>H NMR spectrum of **8**.

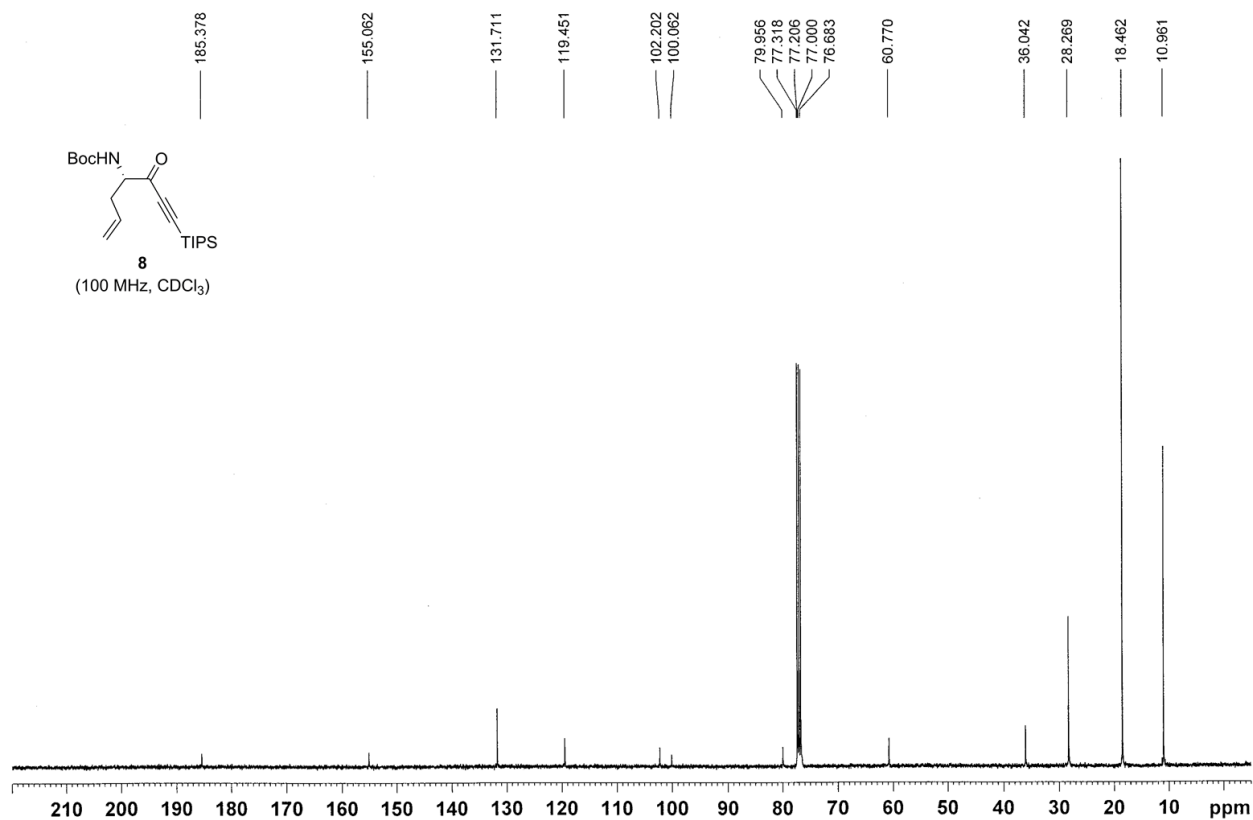

Figure S2. <sup>13</sup>C NMR spectrum of **8**.

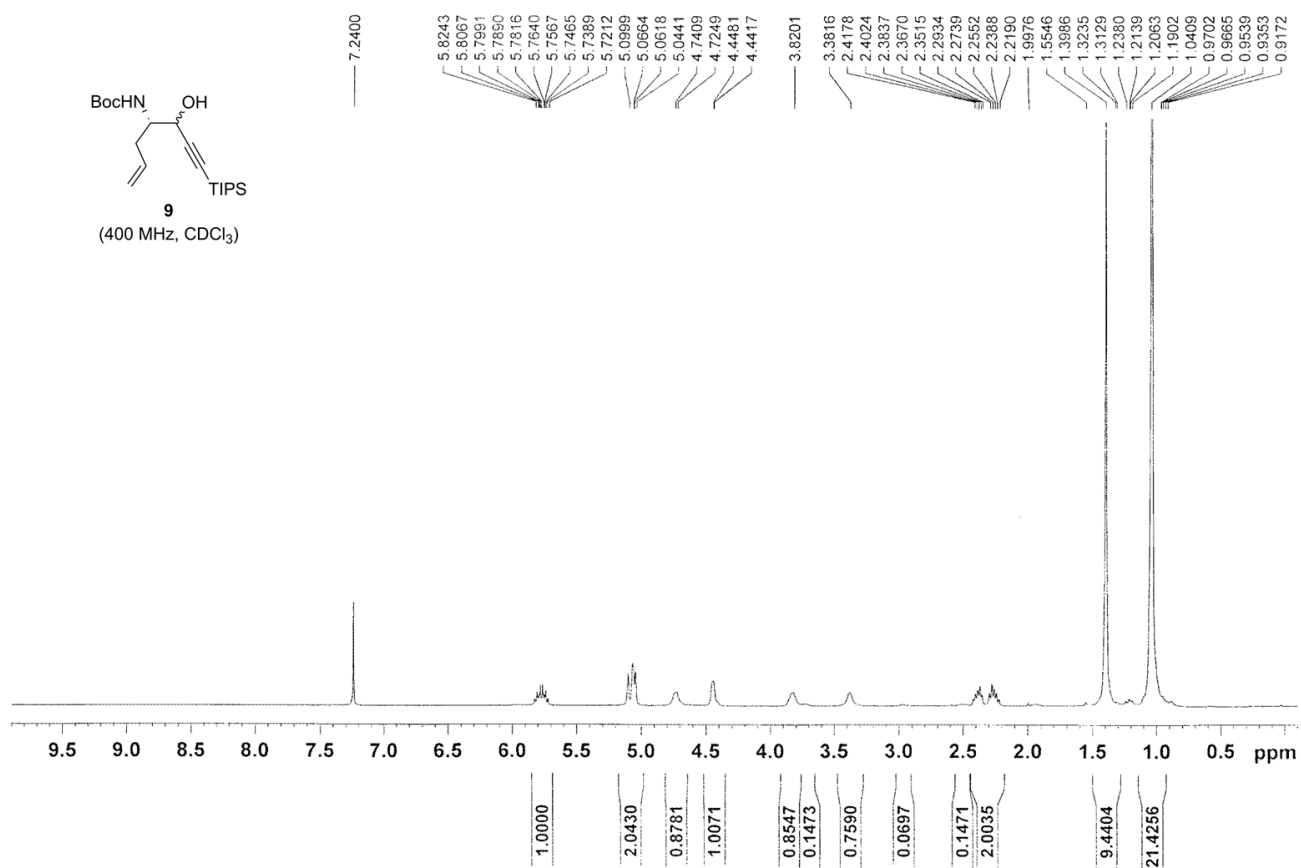Figure S3. <sup>1</sup>H NMR spectrum of **9**.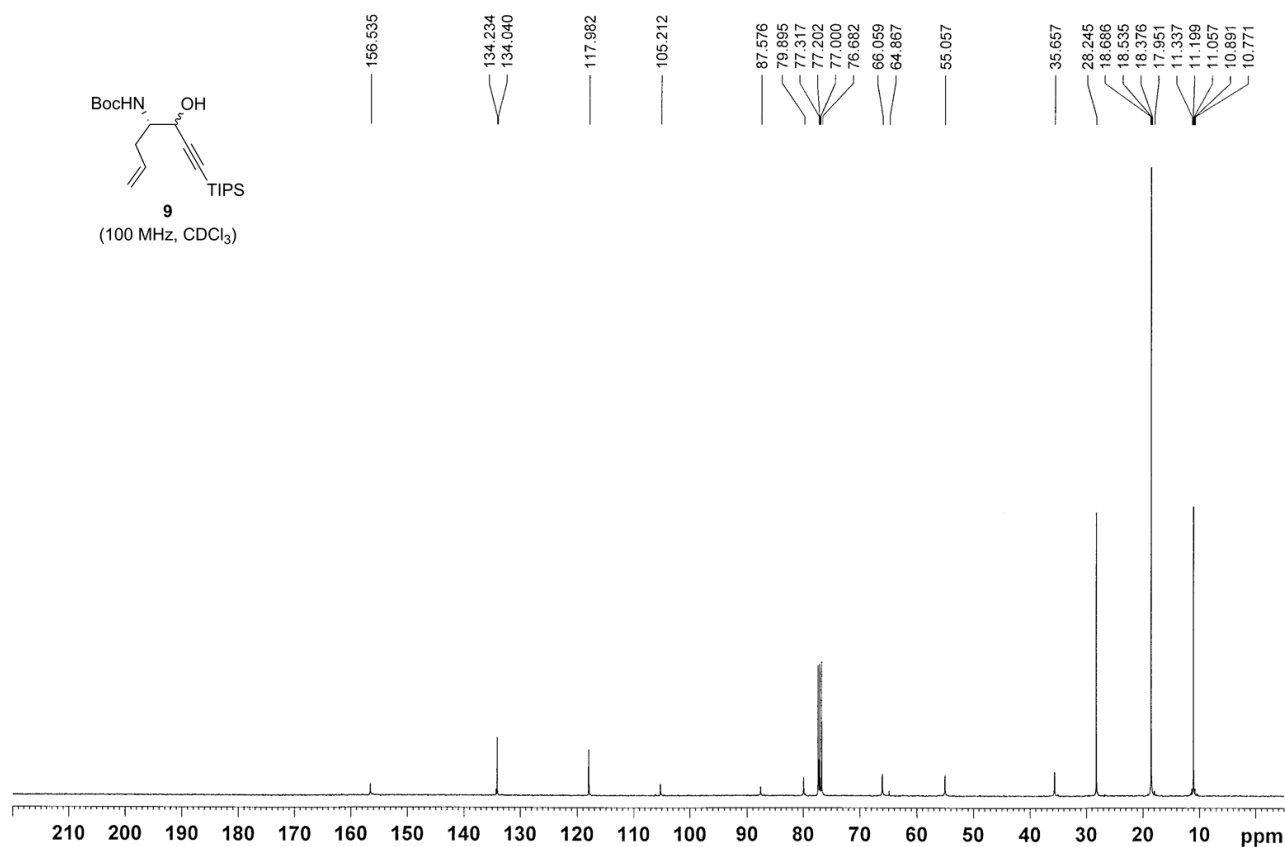Figure S4. <sup>13</sup>C NMR spectrum of **9**.

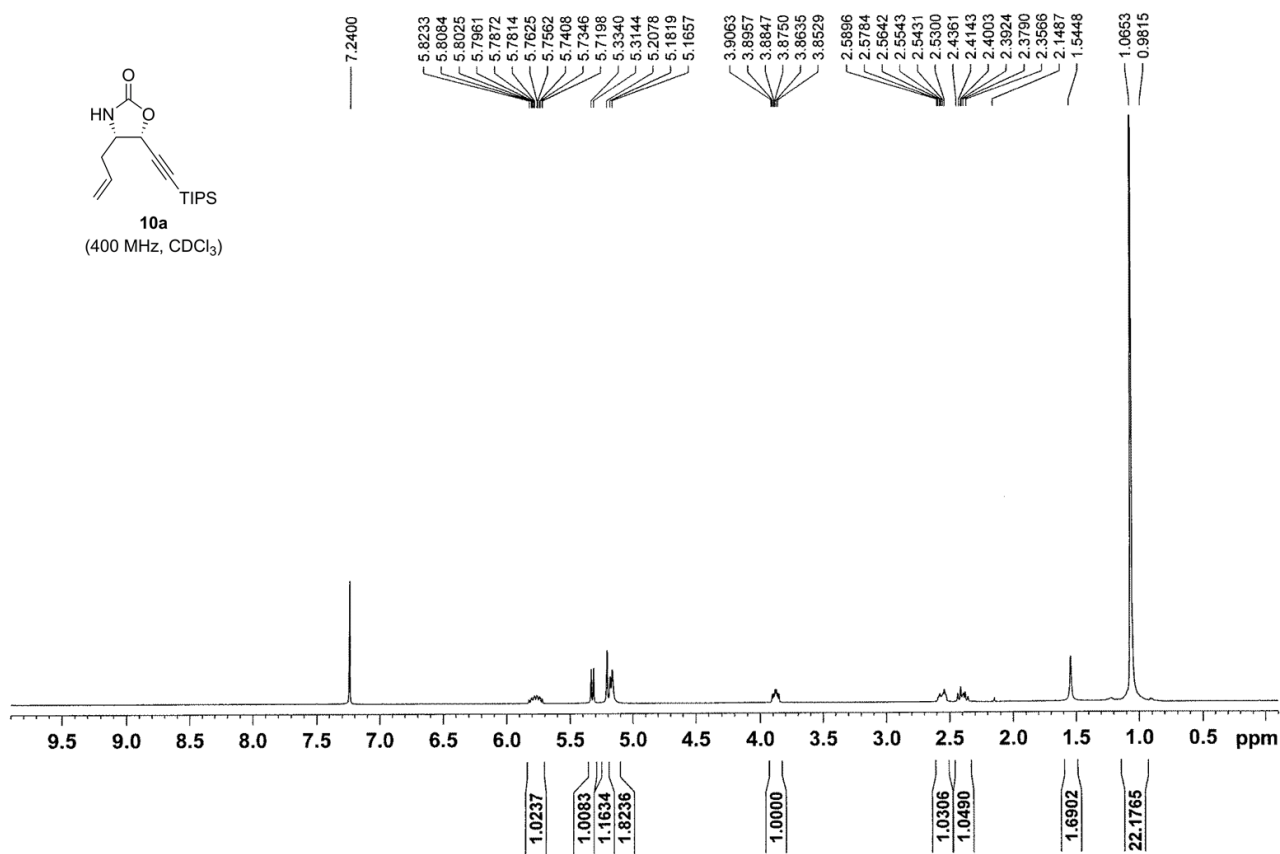Figure S5. <sup>1</sup>H NMR spectrum of **10a**.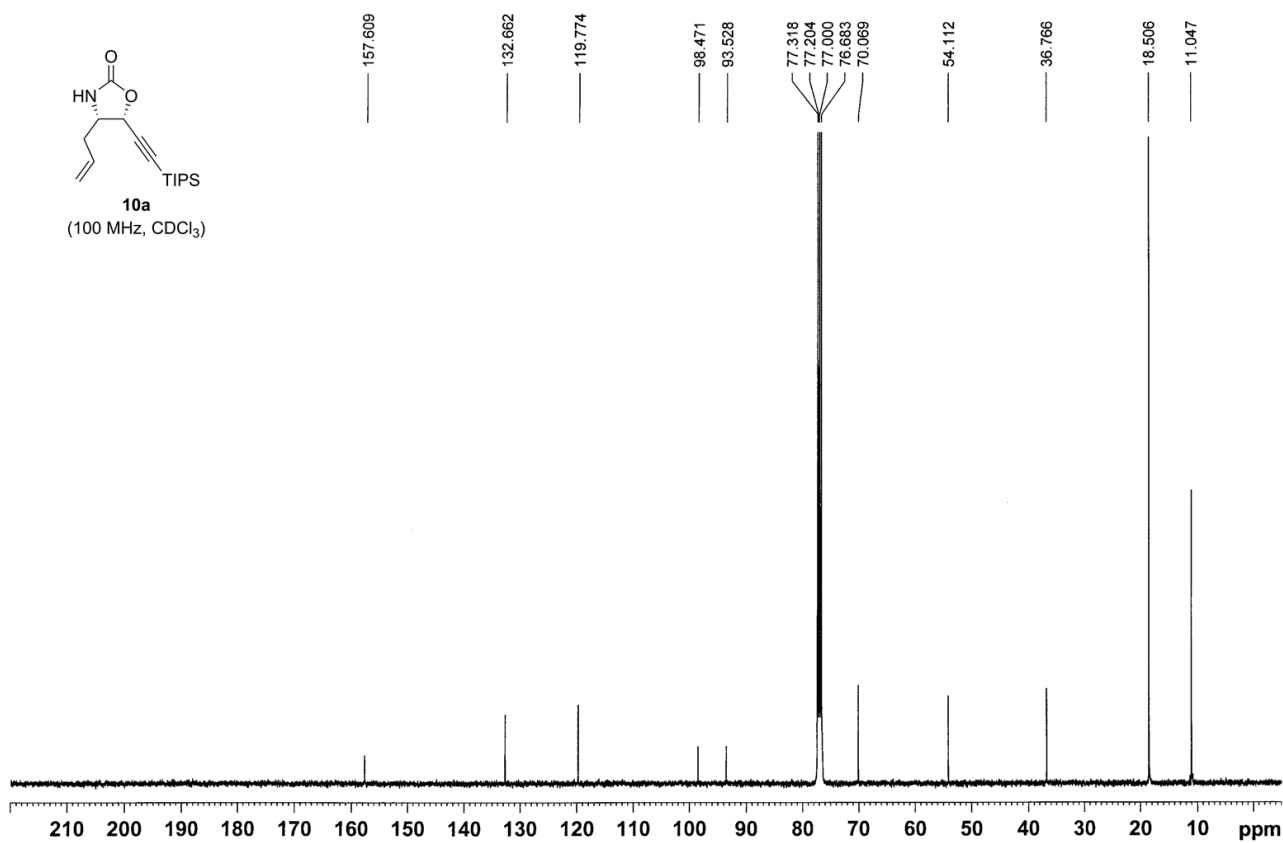Figure S6. <sup>13</sup>C NMR spectrum of **10a**.

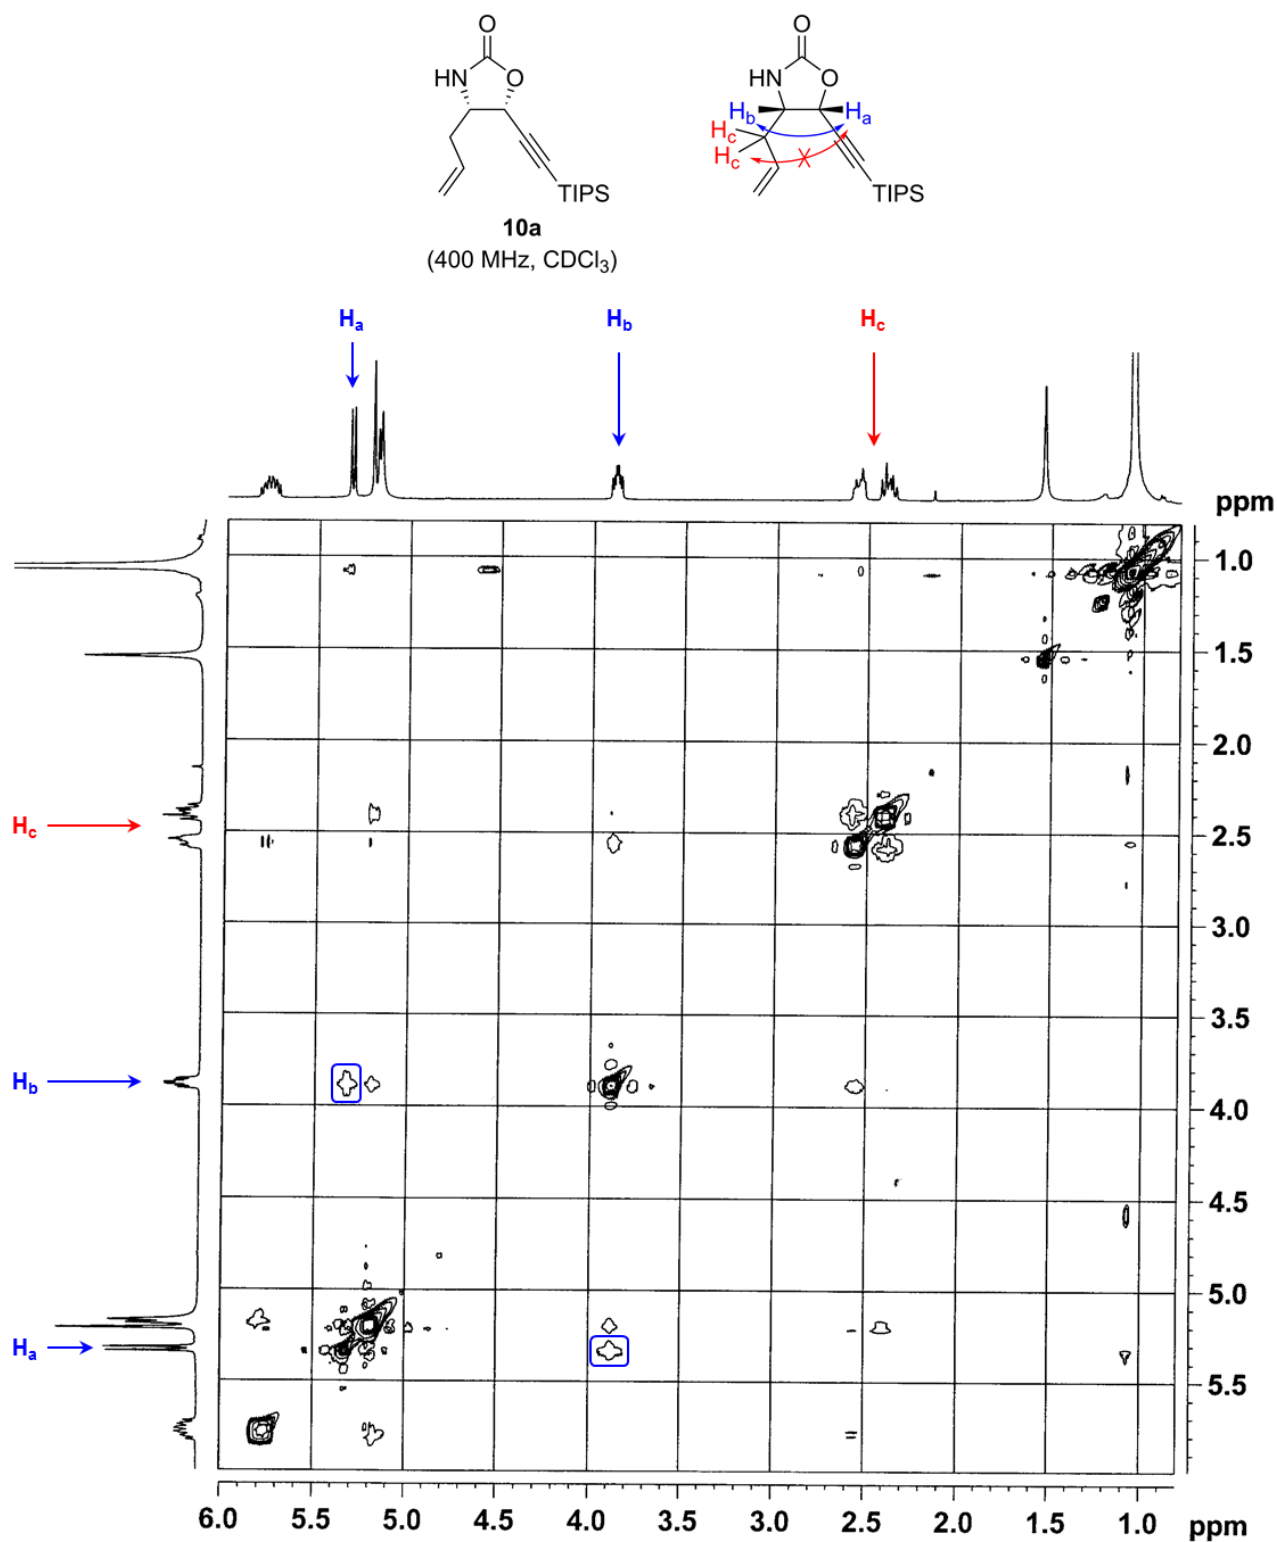Figure S7. 2D NOESY spectrum of **10a**.

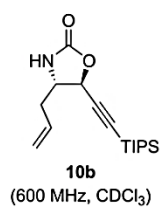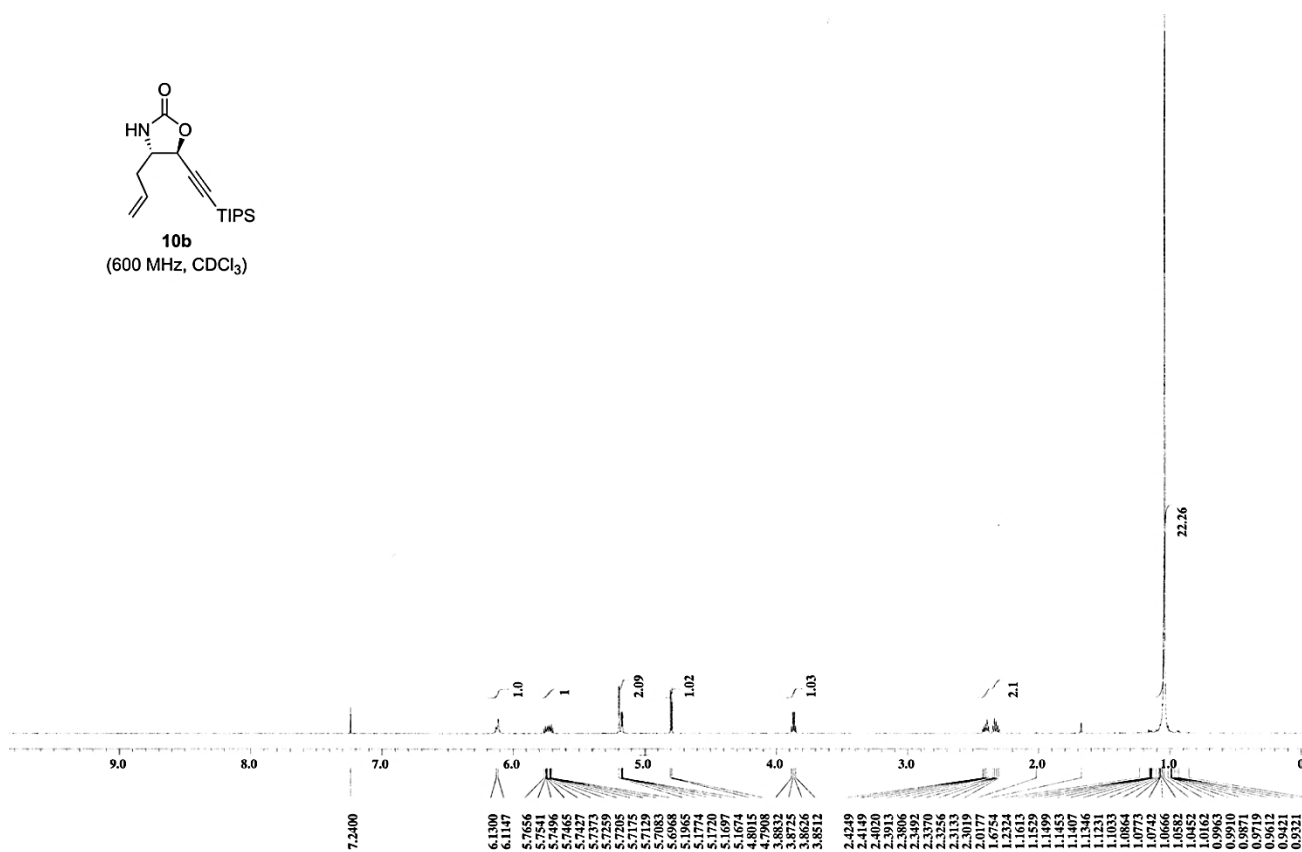

**Figure S8.** <sup>1</sup>H NMR spectrum of **10b**.

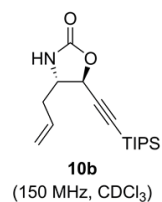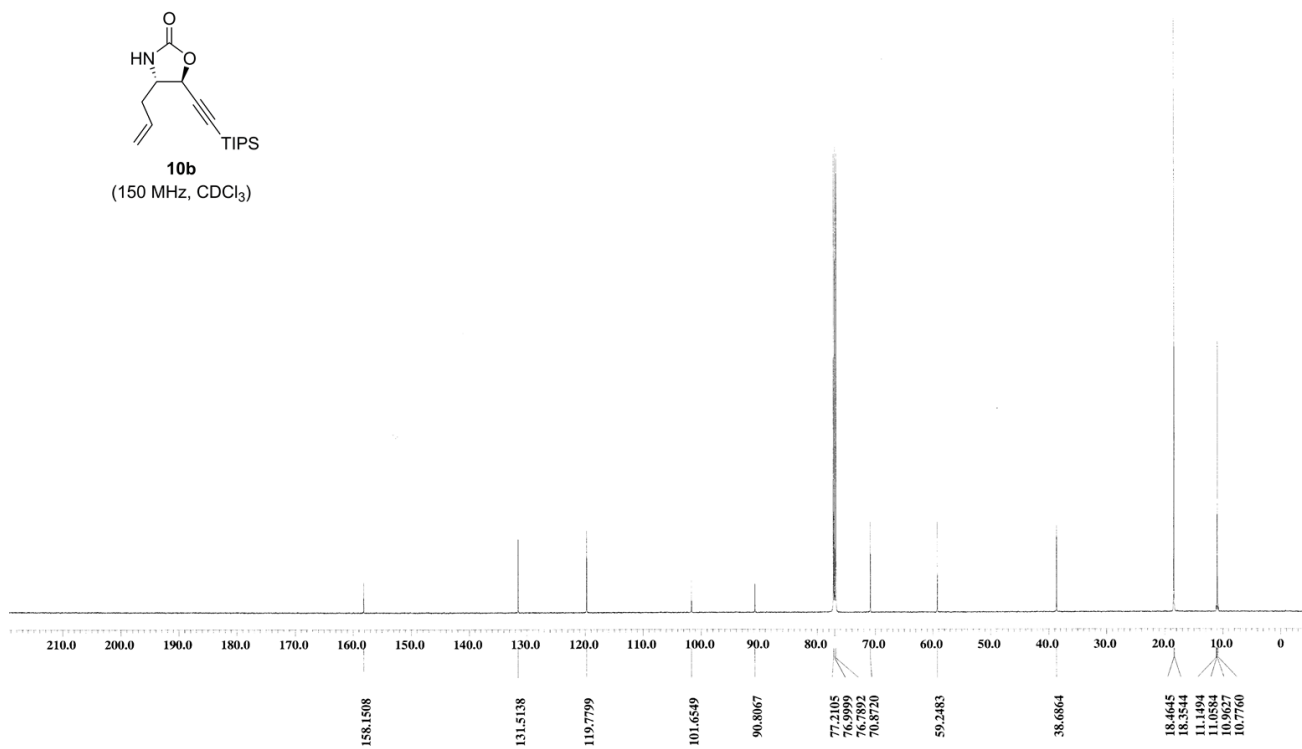

**Figure S9.** <sup>13</sup>C NMR spectrum of **10b**.

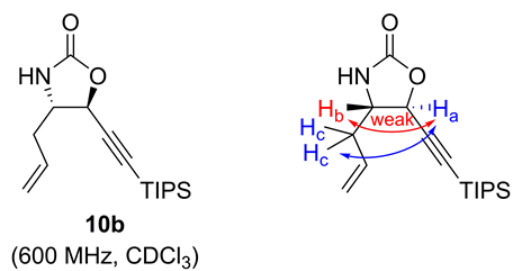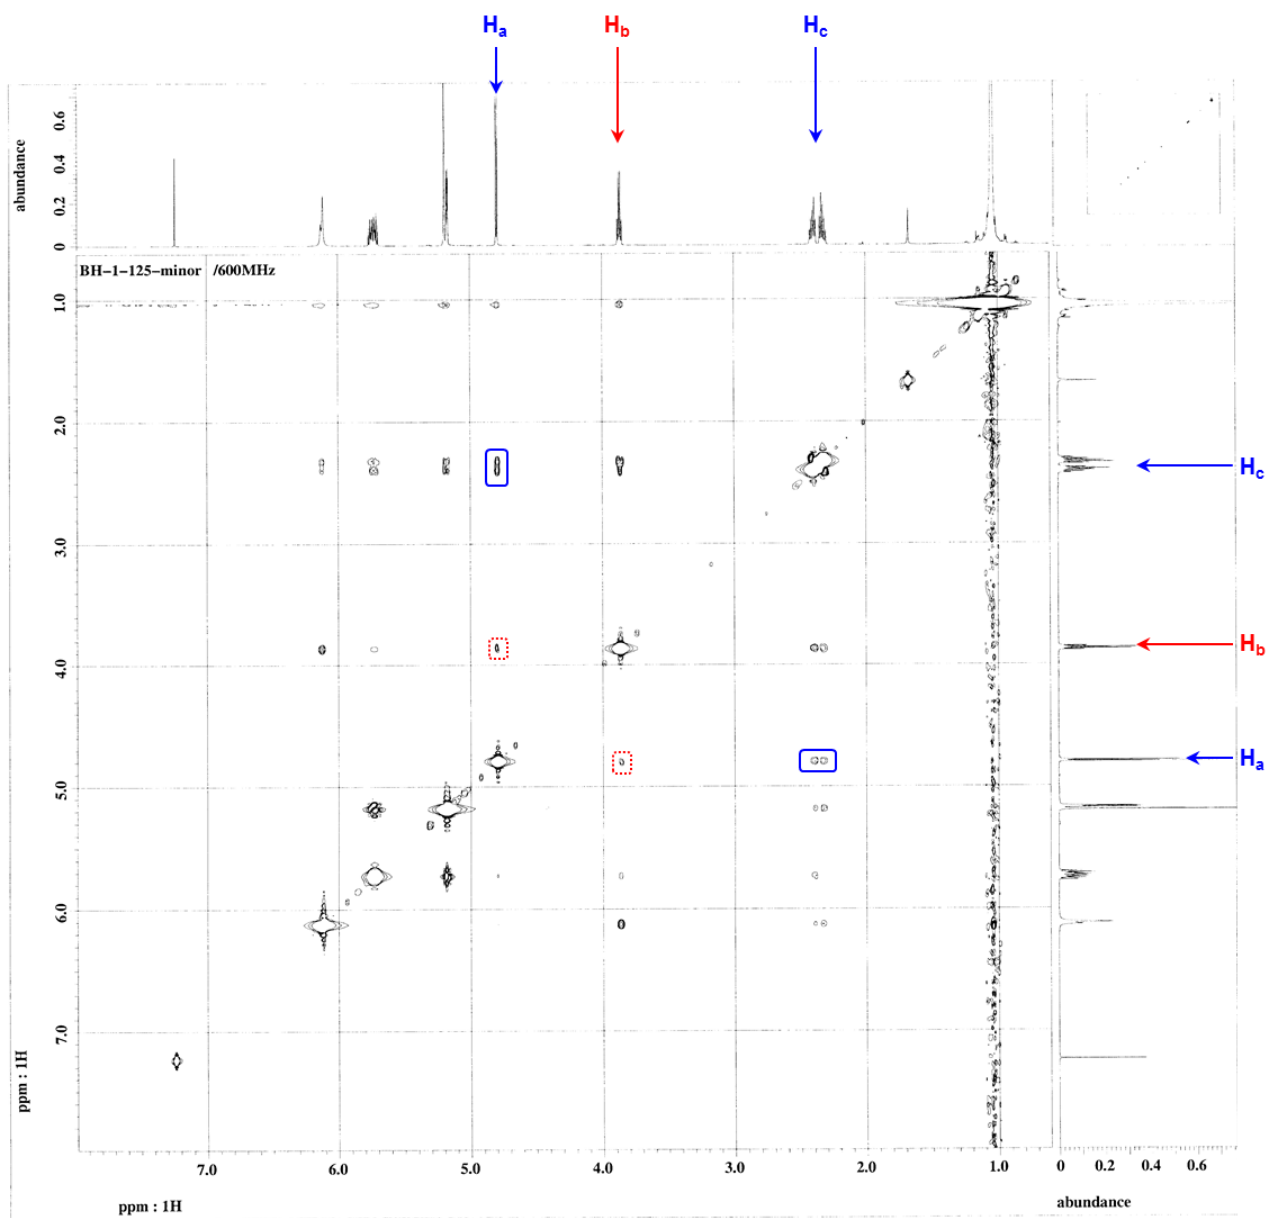

Figure S10. 2D NOESY spectrum of **10b**.

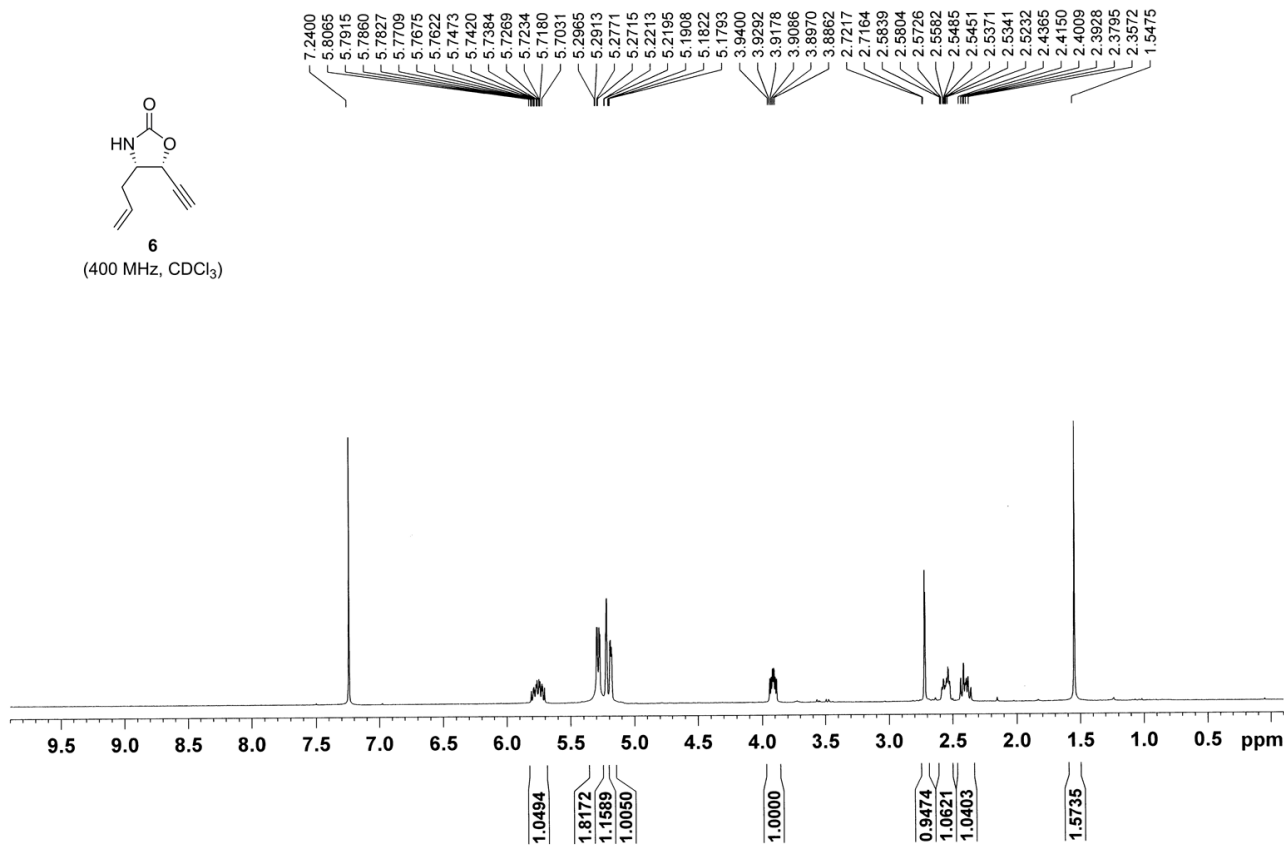Figure S11. <sup>1</sup>H NMR spectrum of **6**.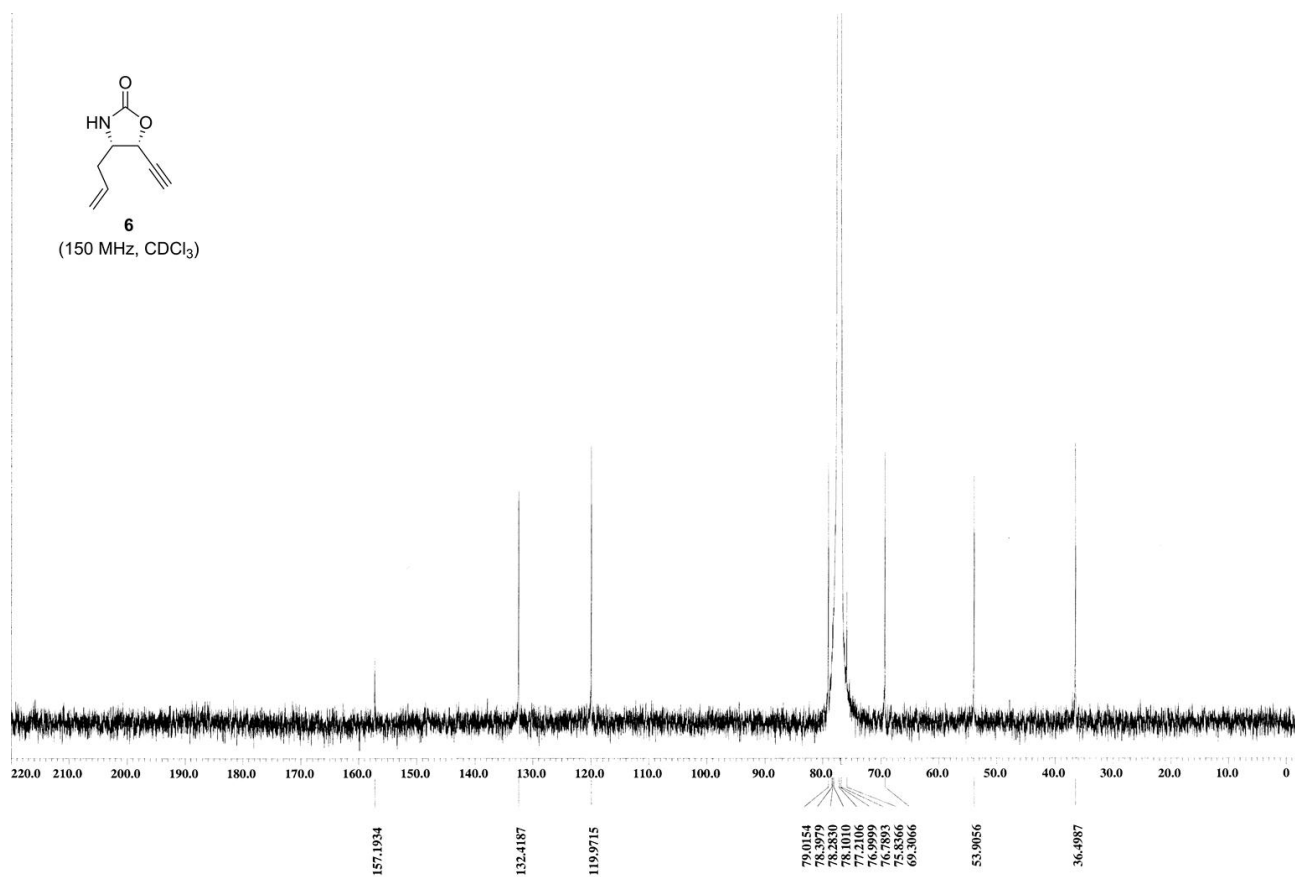Figure S12. <sup>13</sup>C NMR spectrum of **6**.

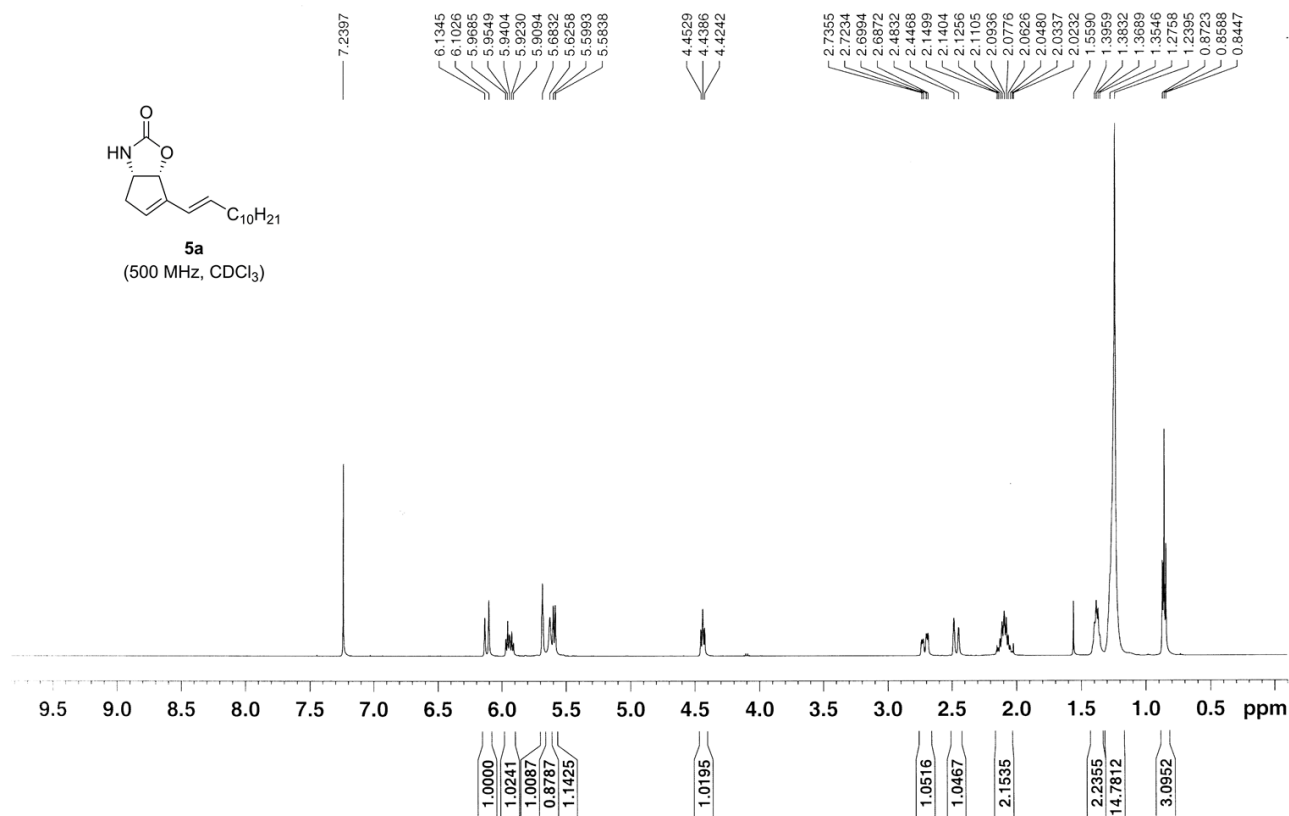Figure S13. <sup>1</sup>H NMR spectrum of **5a**.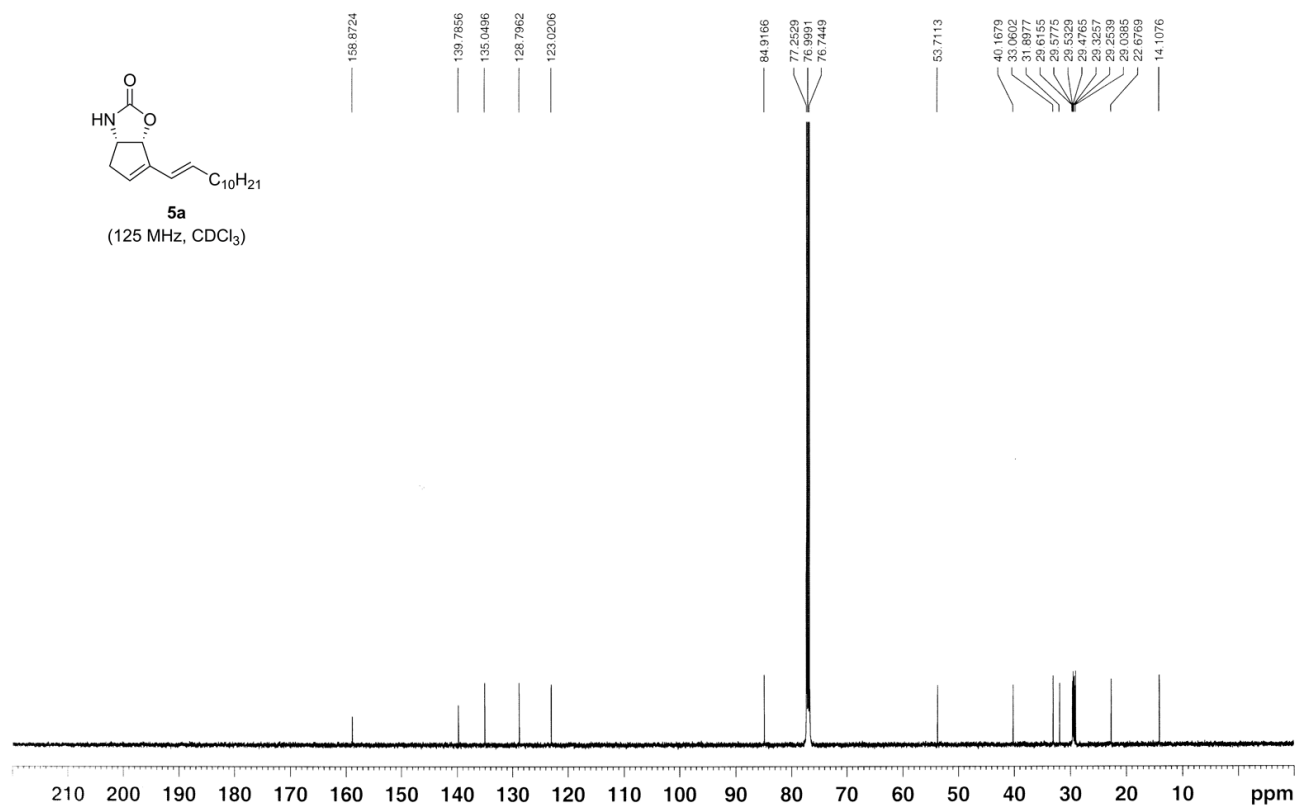Figure S14. <sup>13</sup>C NMR spectrum of **5a**.



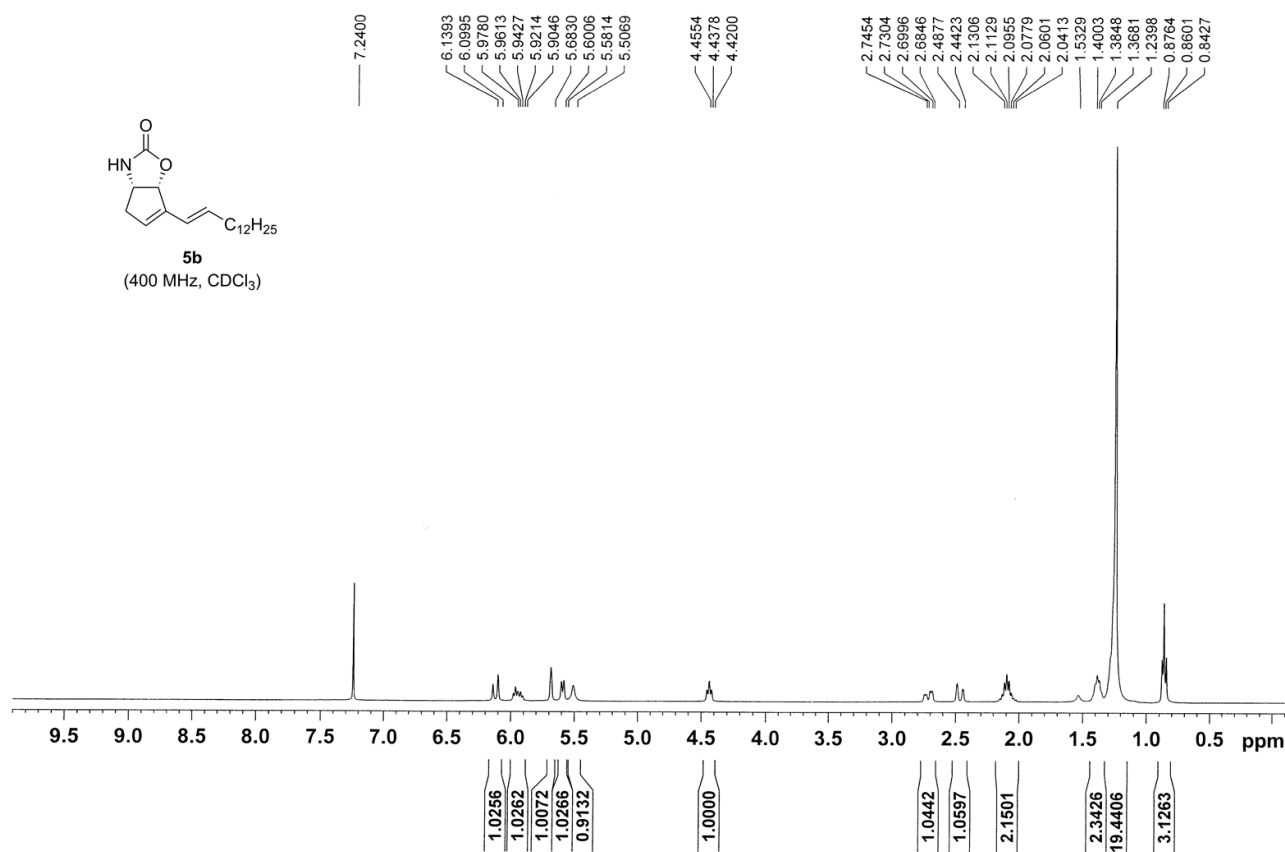Figure S15. <sup>1</sup>H NMR spectrum of **5b**.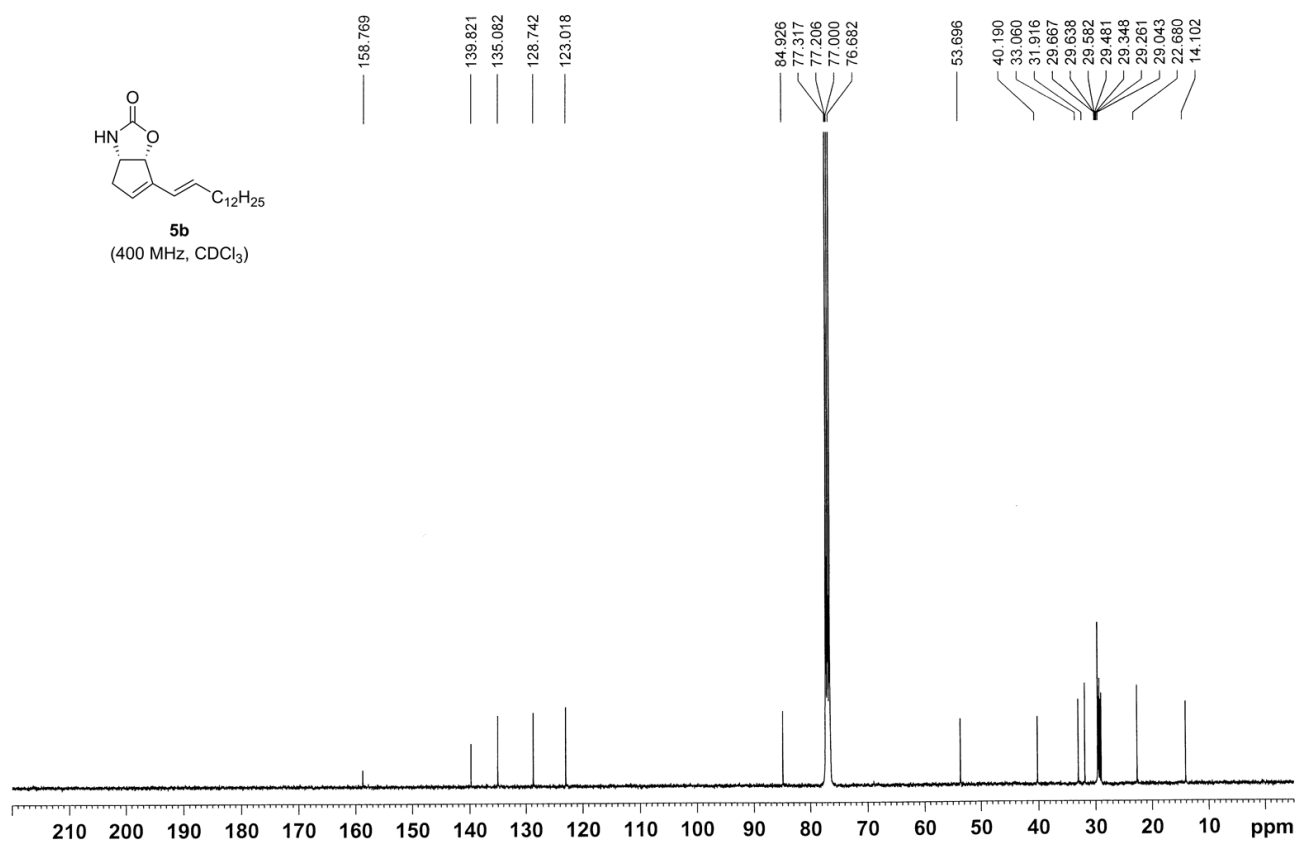Figure S16. <sup>13</sup>C NMR spectrum of **5b**.

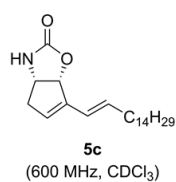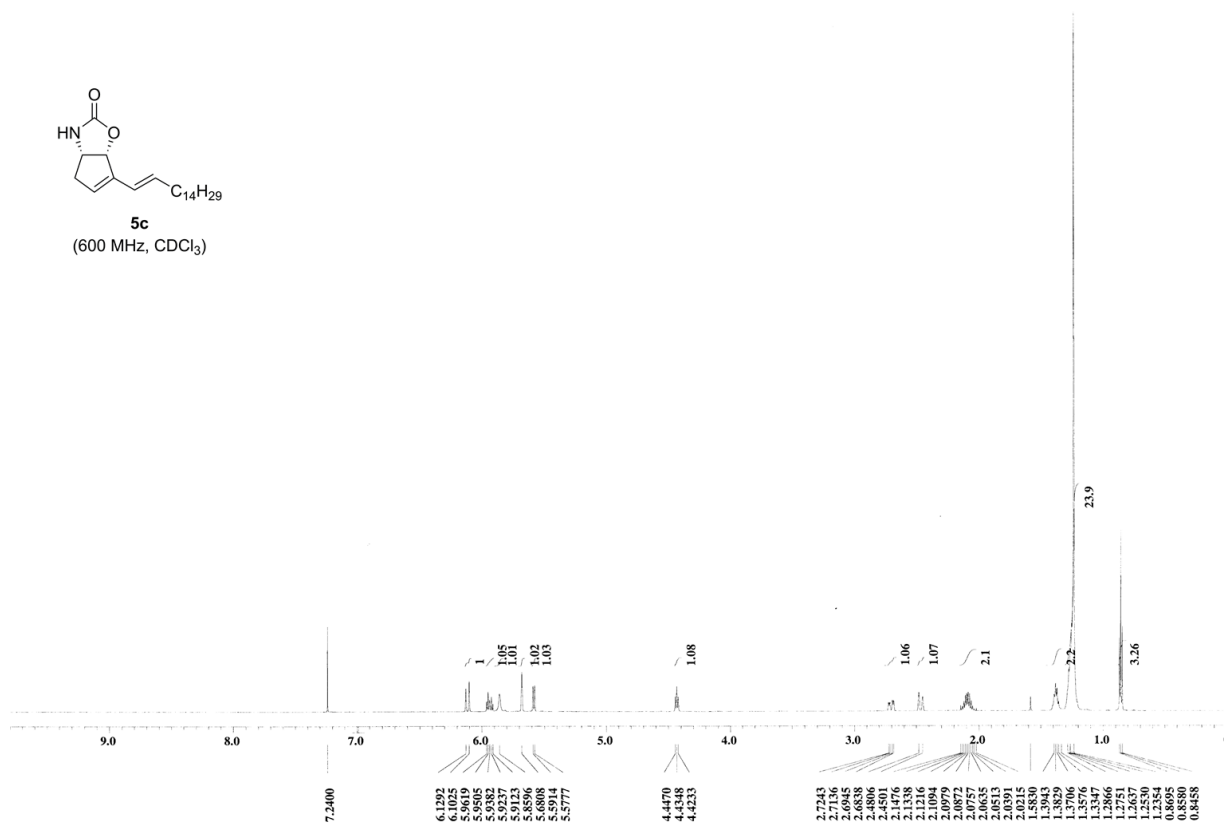Figure S17. <sup>1</sup>H NMR spectrum of **5c**.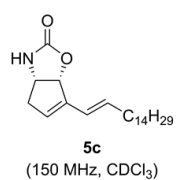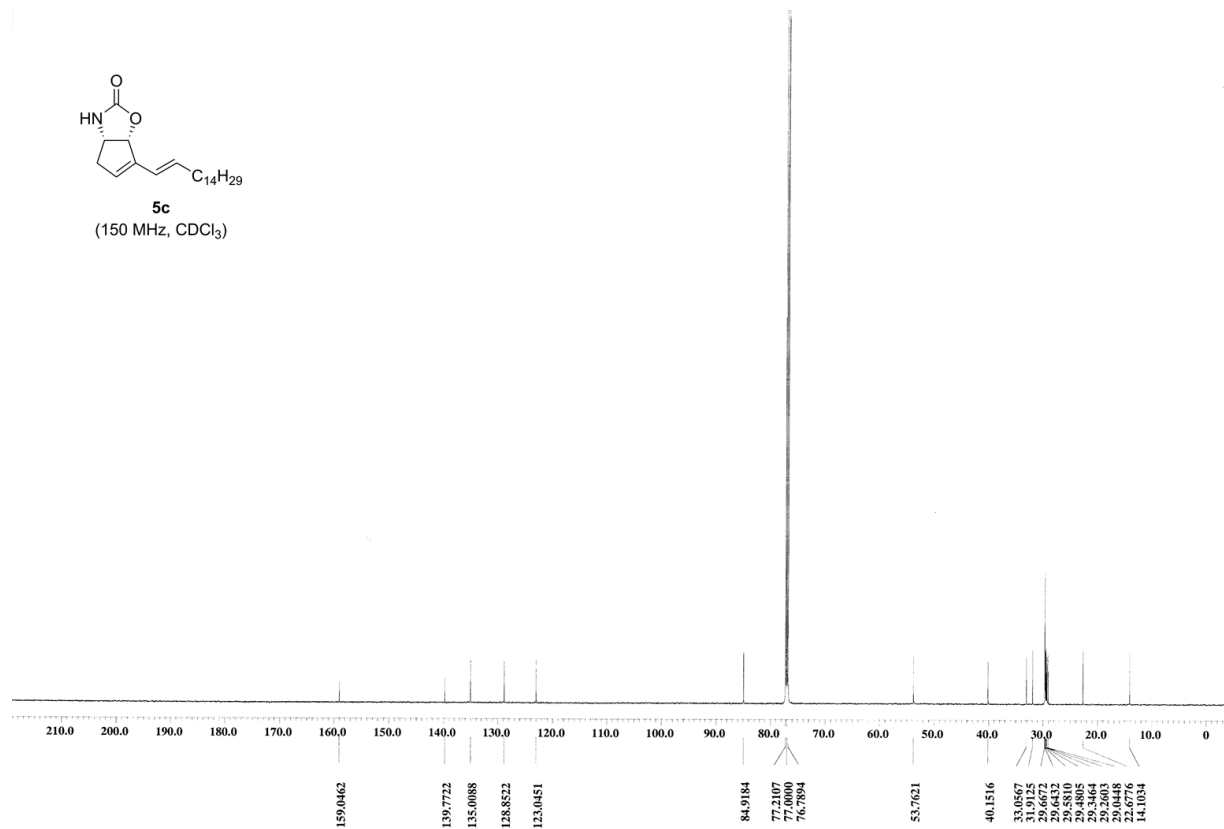Figure S18. <sup>13</sup>C NMR spectrum of **5c**.

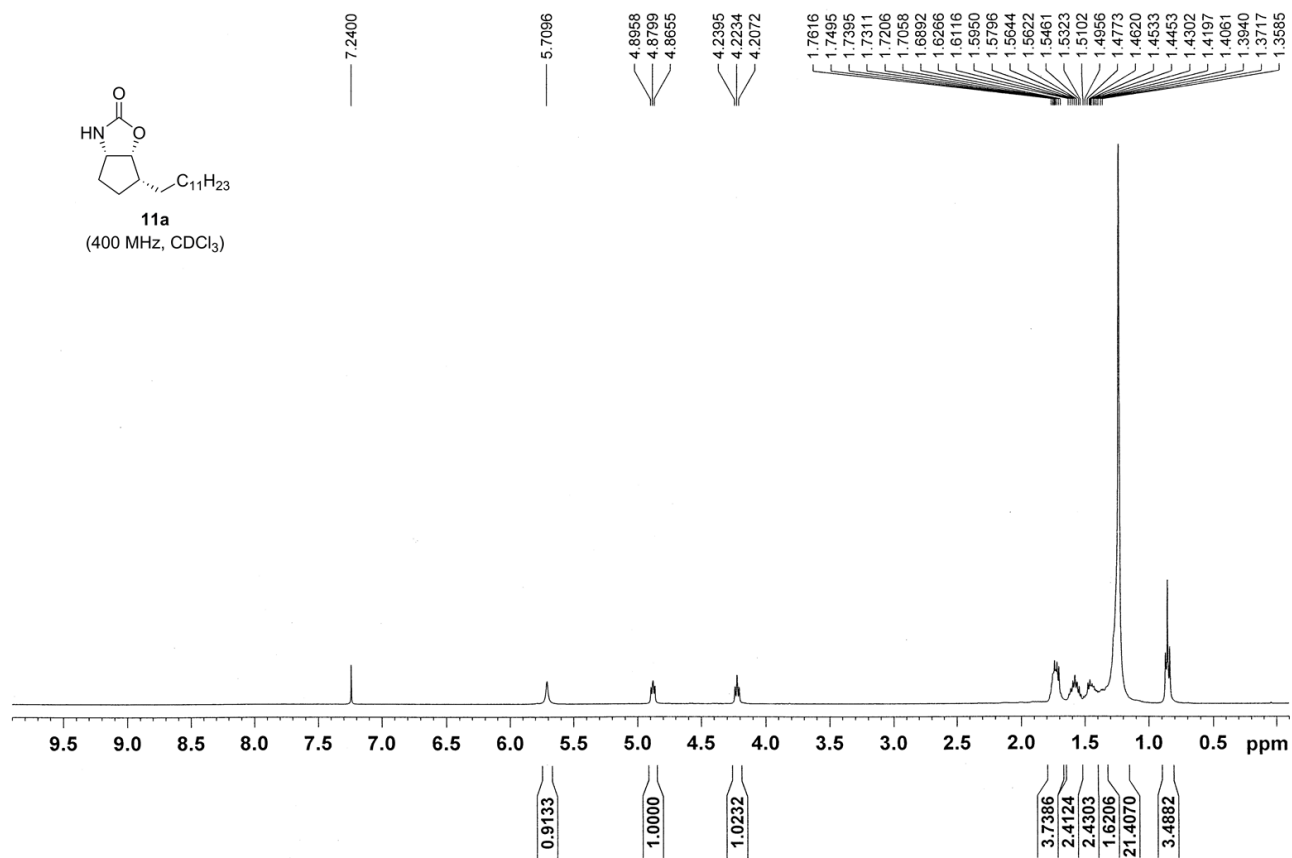Figure S19. <sup>1</sup>H NMR spectrum of **11a**.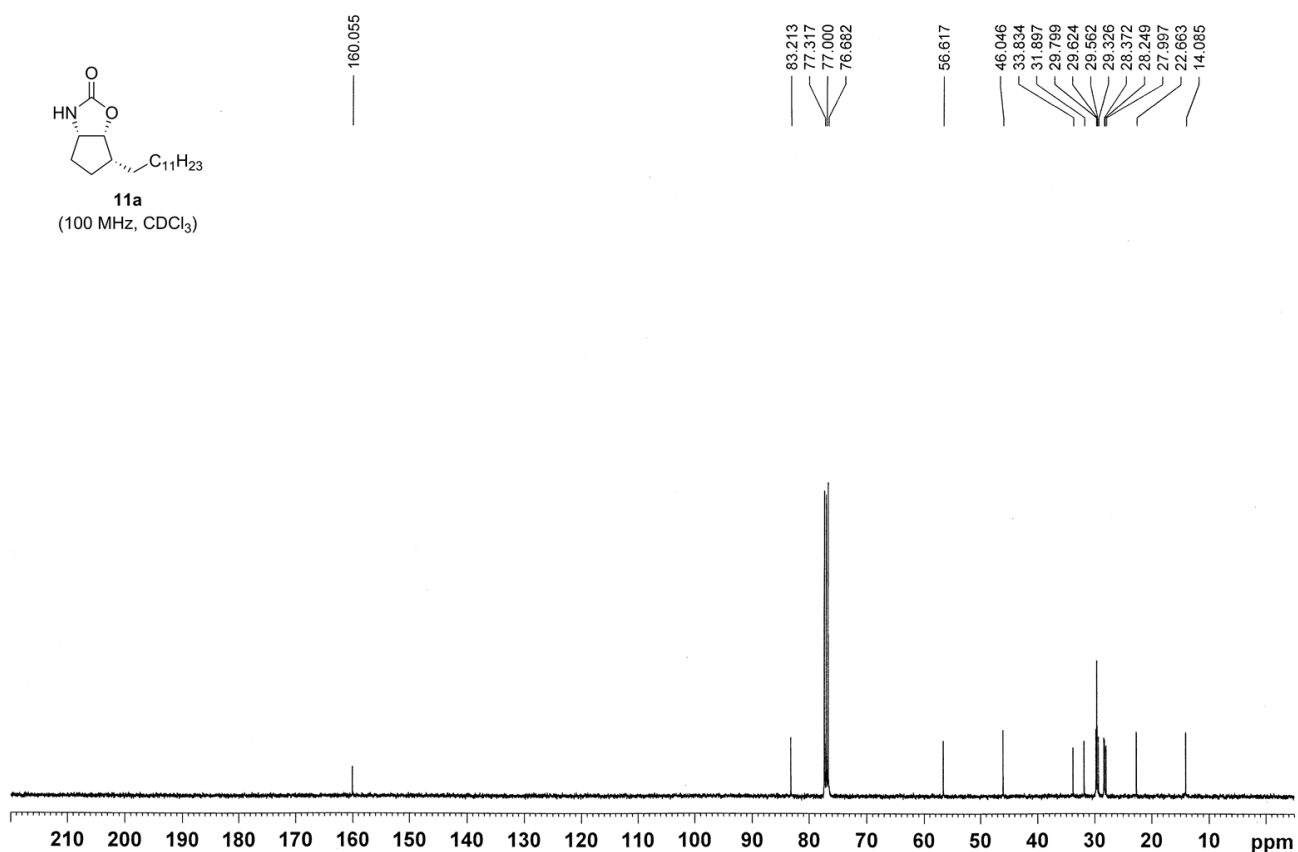Figure S20. <sup>13</sup>C NMR spectrum of **11a**.

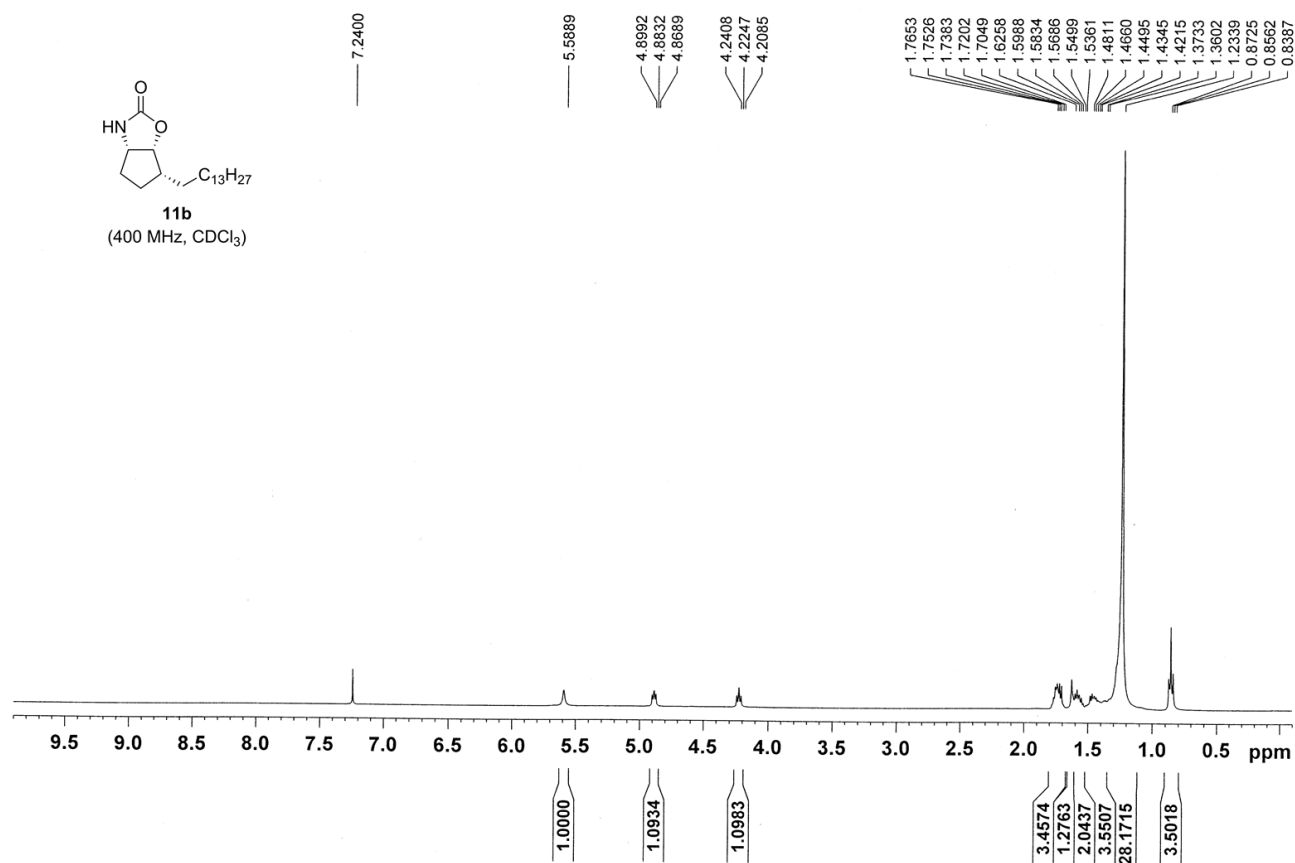Figure S21. <sup>1</sup>H NMR spectrum of **11b**.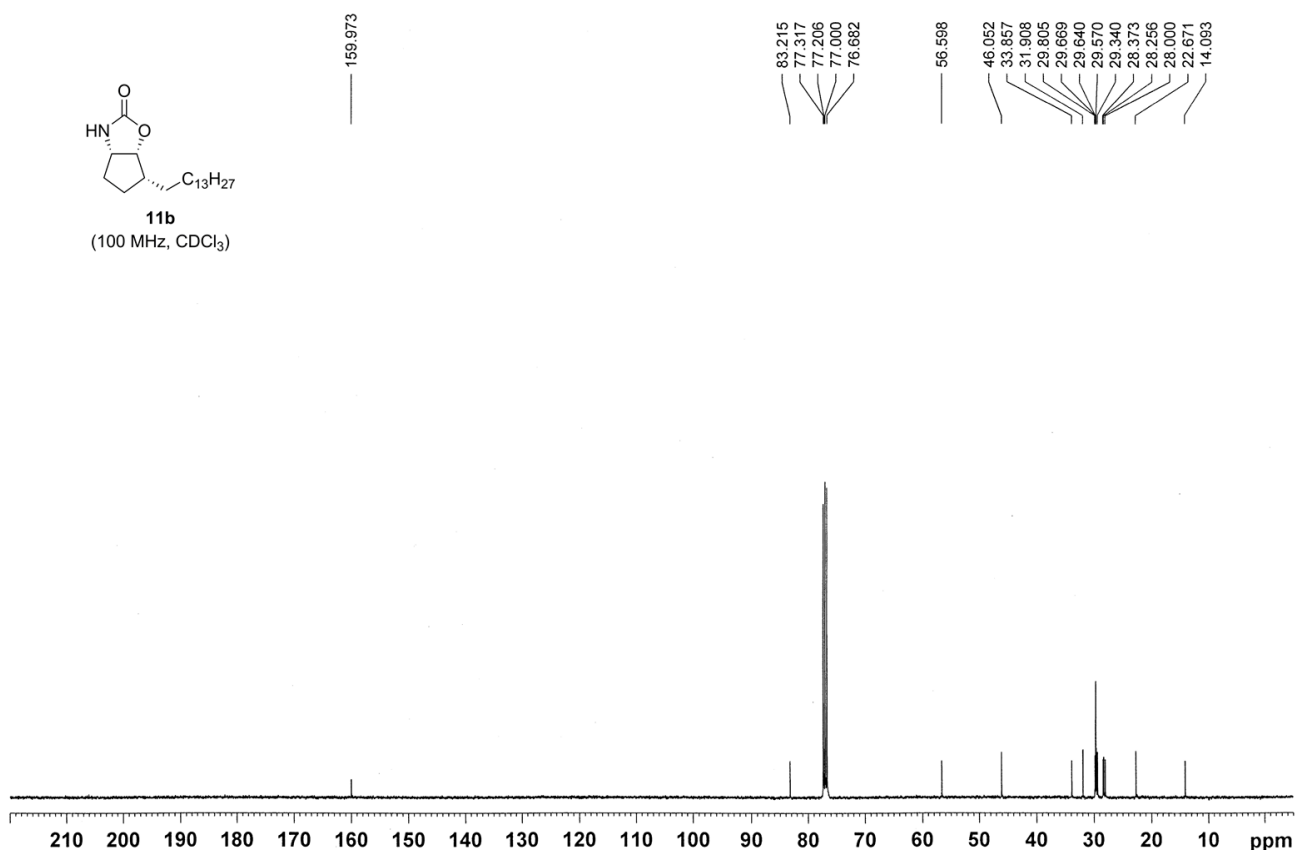Figure S22. <sup>13</sup>C NMR spectrum of **11b**.

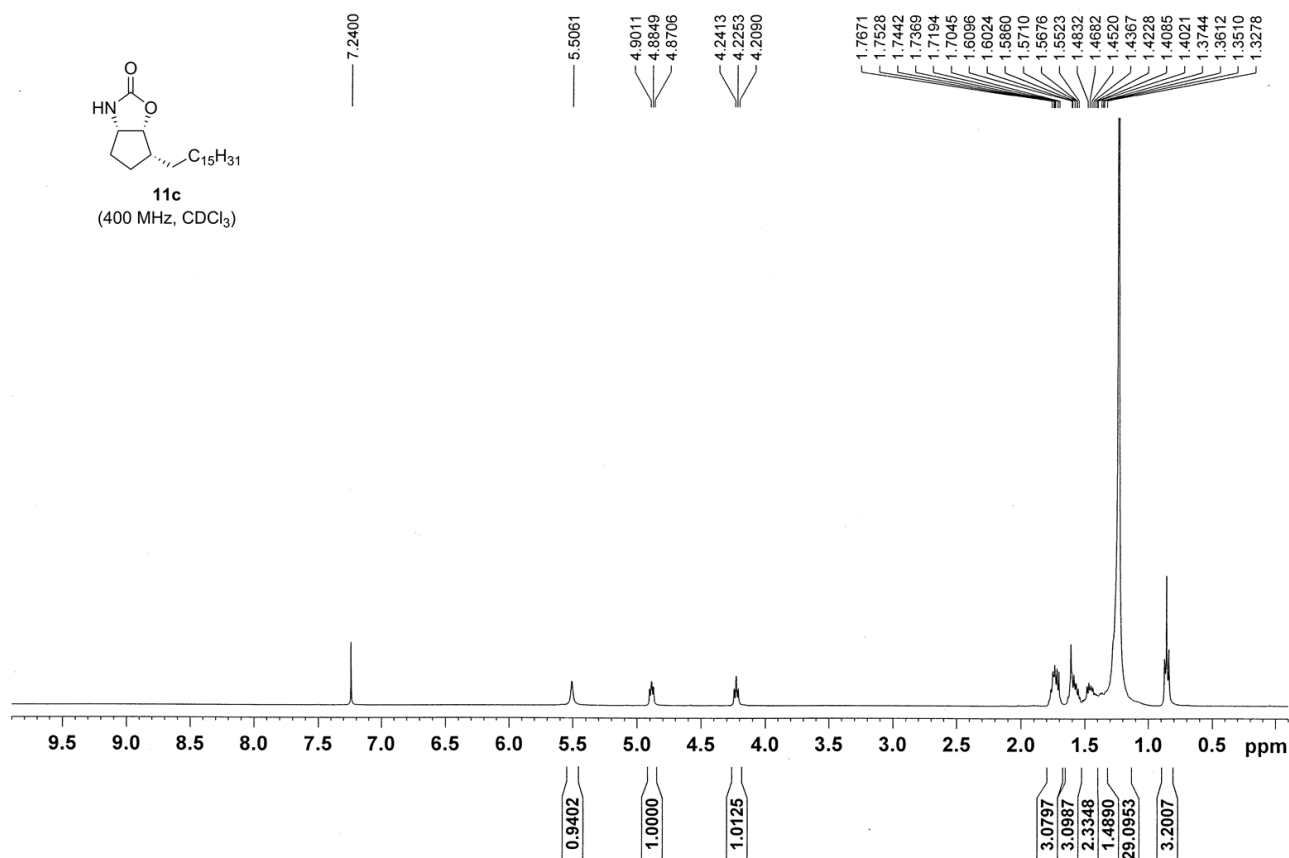Figure S23. <sup>1</sup>H NMR spectrum of **11c**.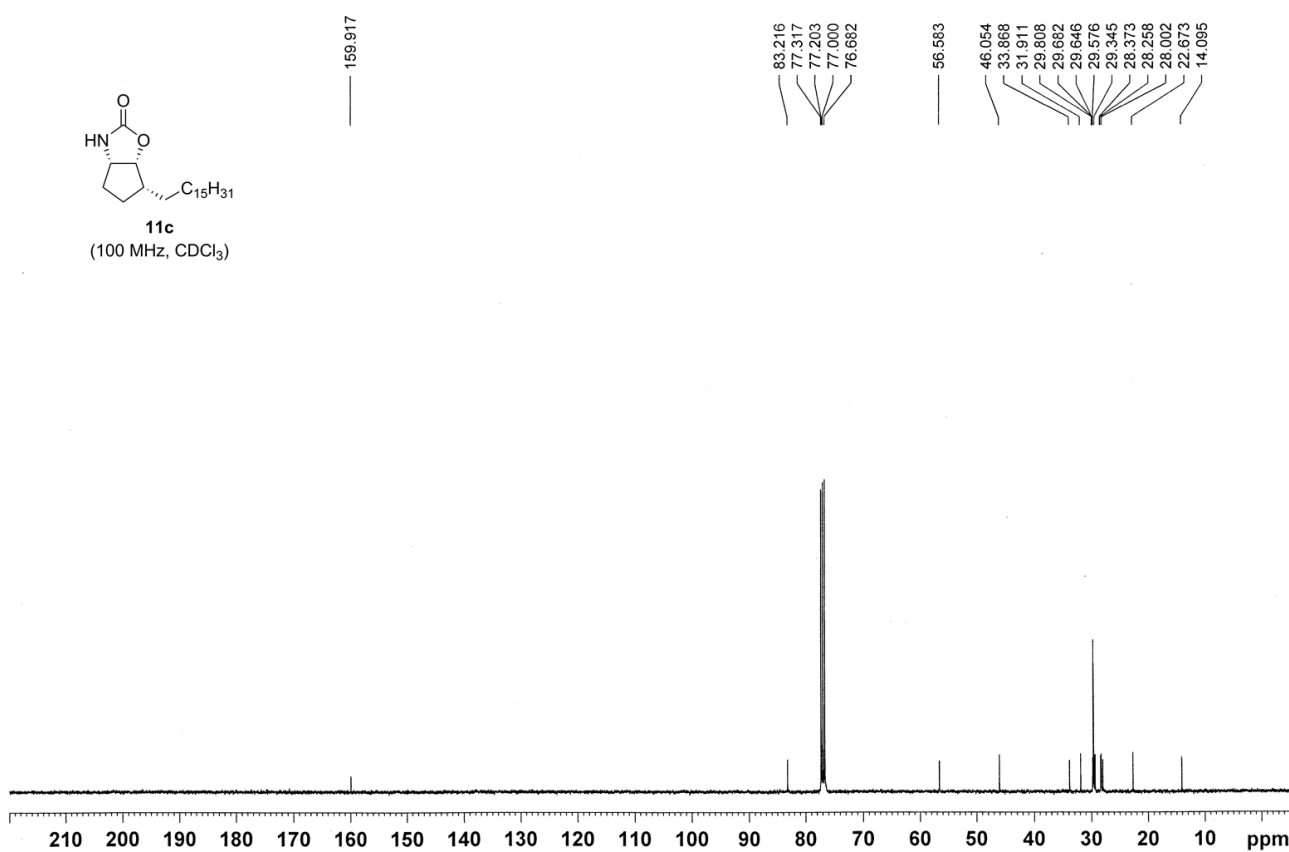Figure S24. <sup>13</sup>C NMR spectrum of **11c**.

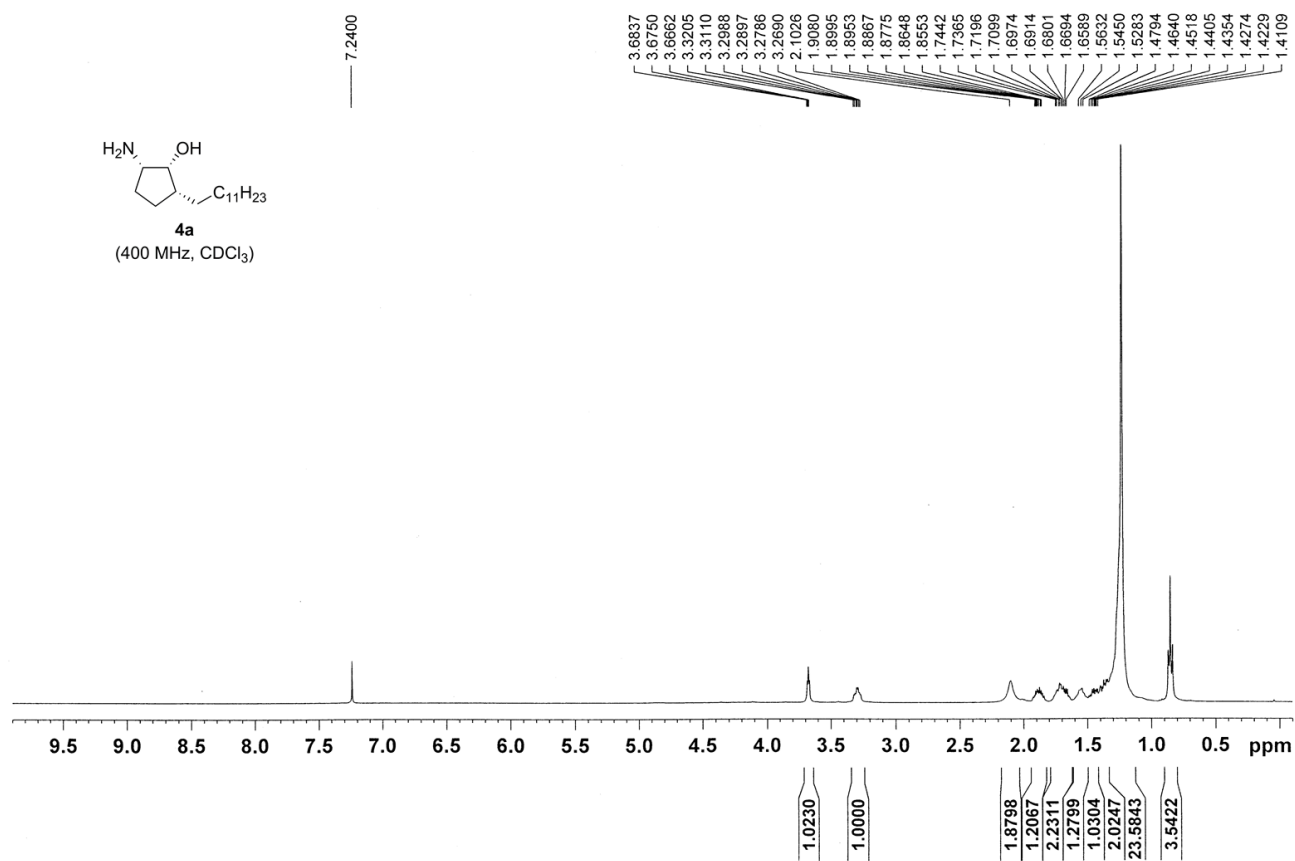Figure S25. <sup>1</sup>H NMR spectrum of **4a**.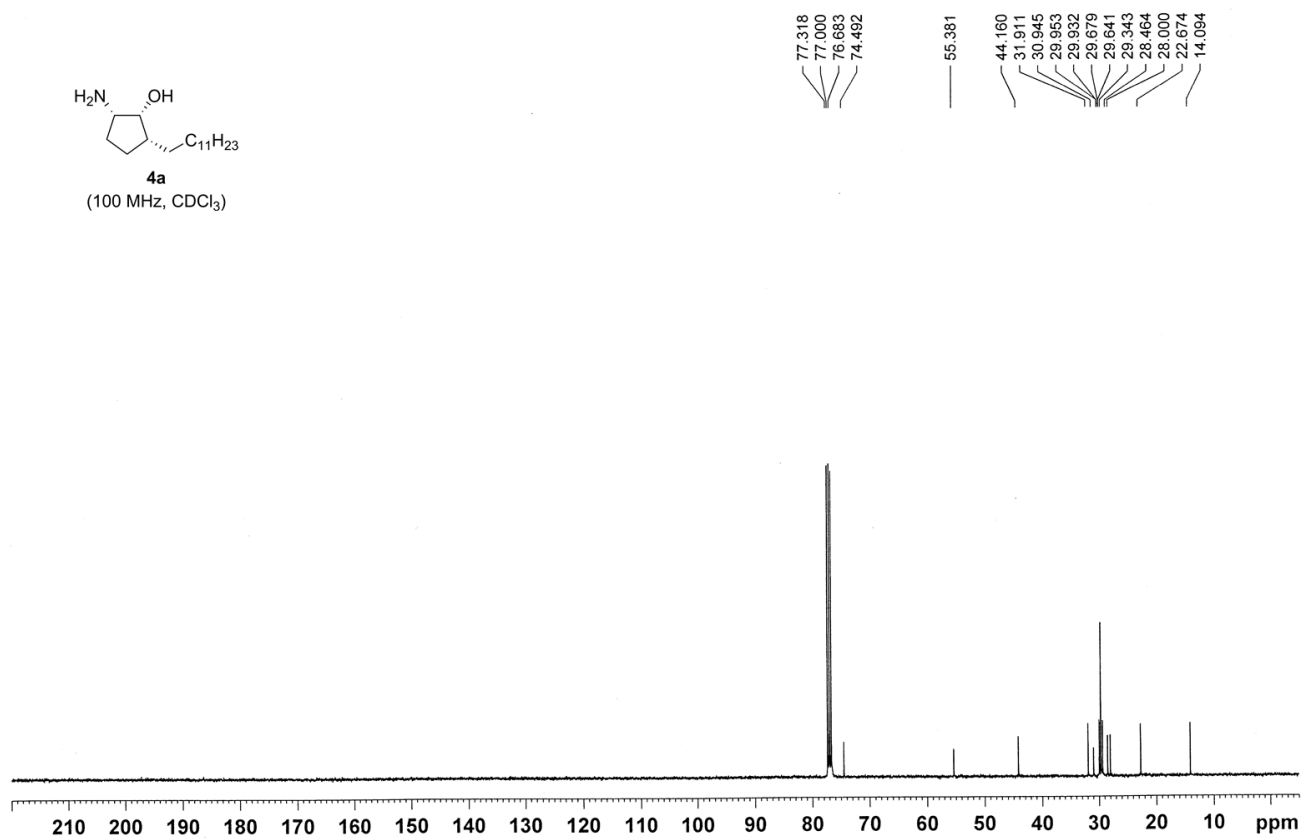Figure S26. <sup>13</sup>C NMR spectrum of **4a**.

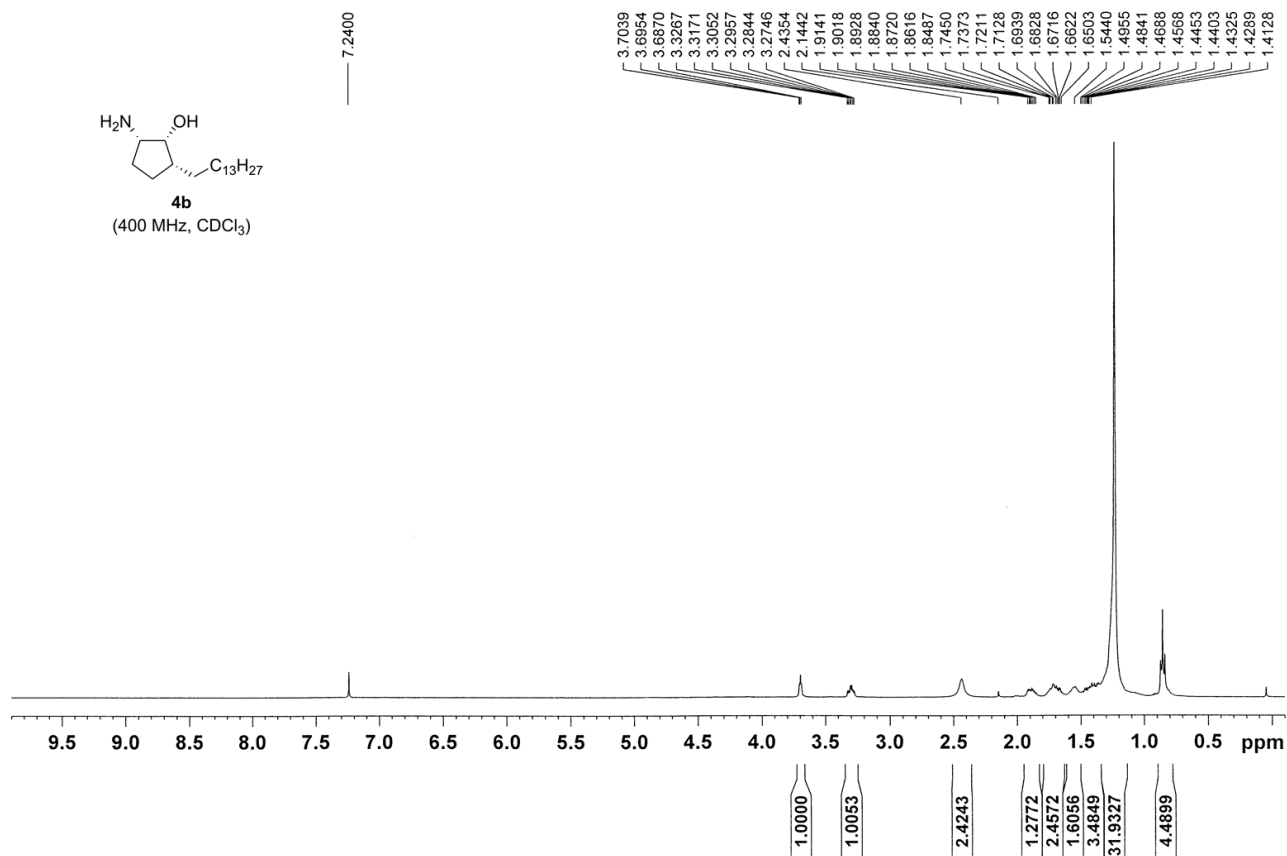Figure S27.  $^1\text{H}$  NMR spectrum of **4b**.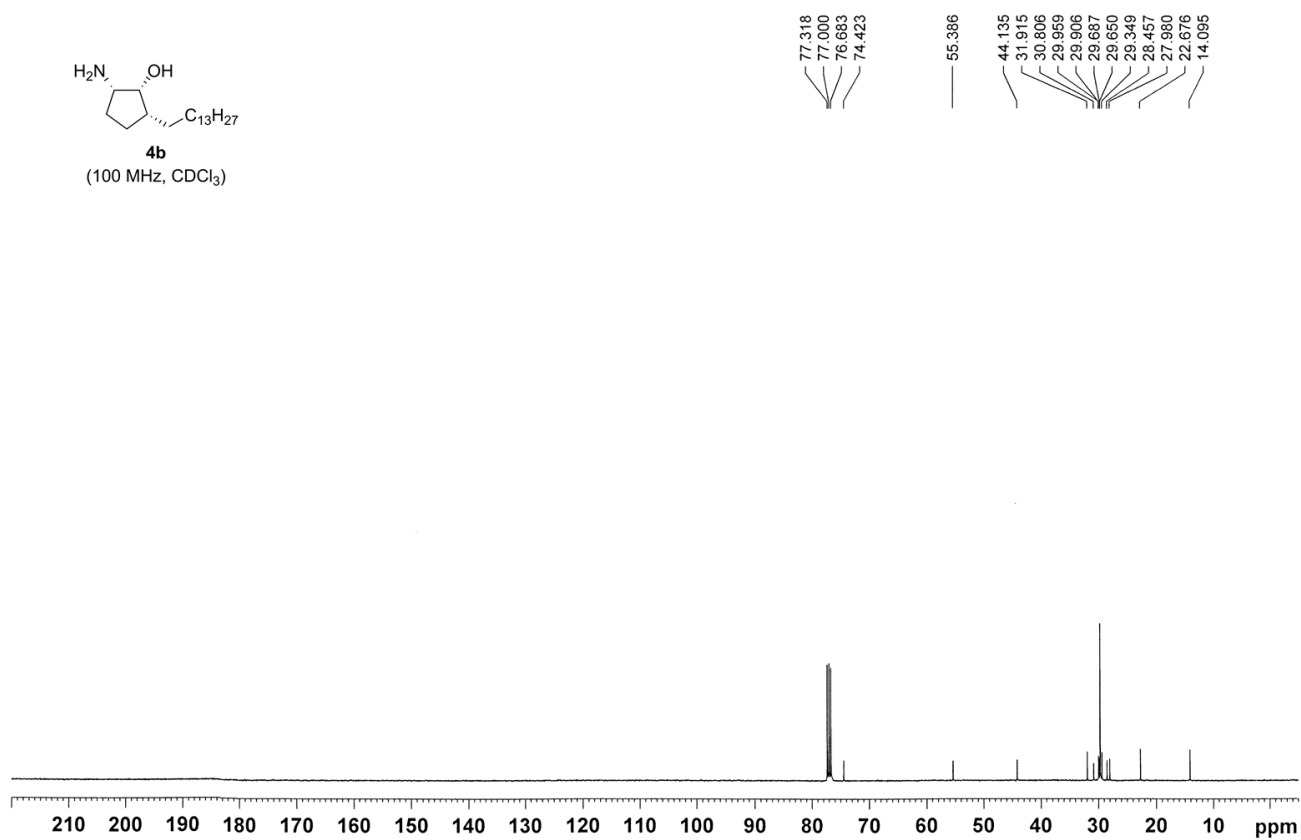Figure S28.  $^{13}\text{C}$  NMR spectrum of **4b**.

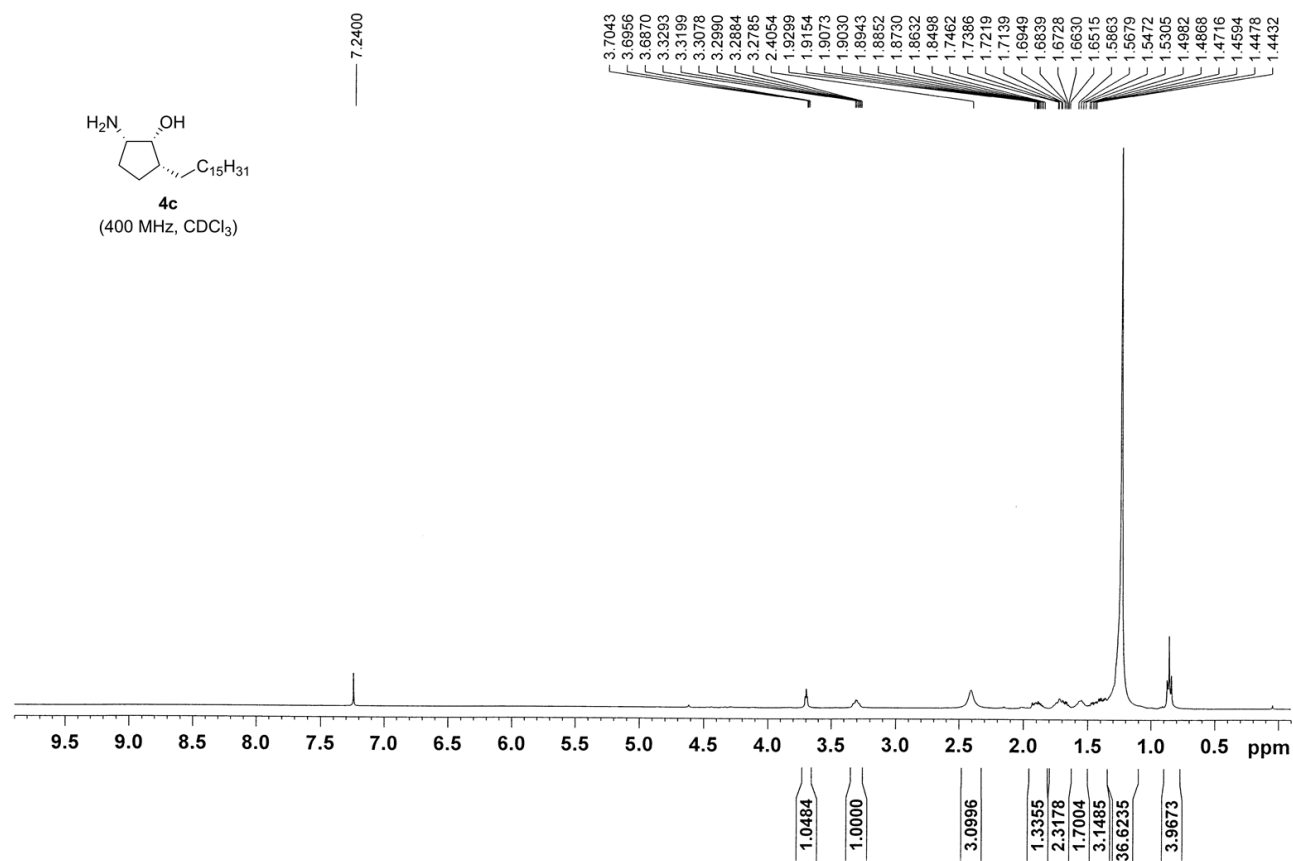

Figure S29. <sup>1</sup>H NMR spectrum of **4c**.



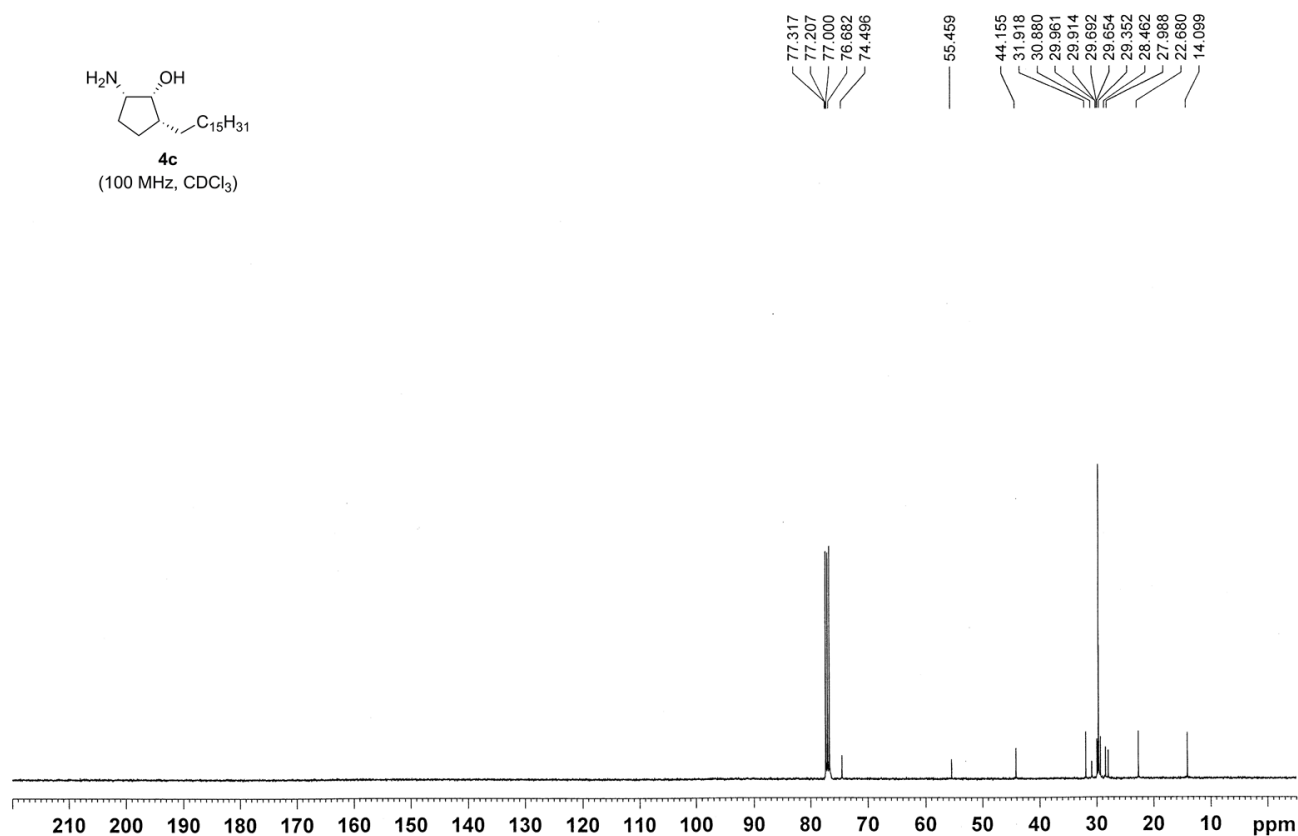

**Figure S30.** <sup>13</sup>C NMR spectrum of **4c**.

© 2015 by the authors; licensee MDPI, Basel, Switzerland. This article is an open access article distributed under the terms and conditions of the Creative Commons Attribution license (<http://creativecommons.org/licenses/by/4.0/>).
